# Supplementary material
Source: PubMed Central journal article supplement (PMC2706098)
Supplement: NIHMS103396-supplement-1.pdf [file NIHMS103396-supplement-1.pdf]

## Supporting Information Figure 1

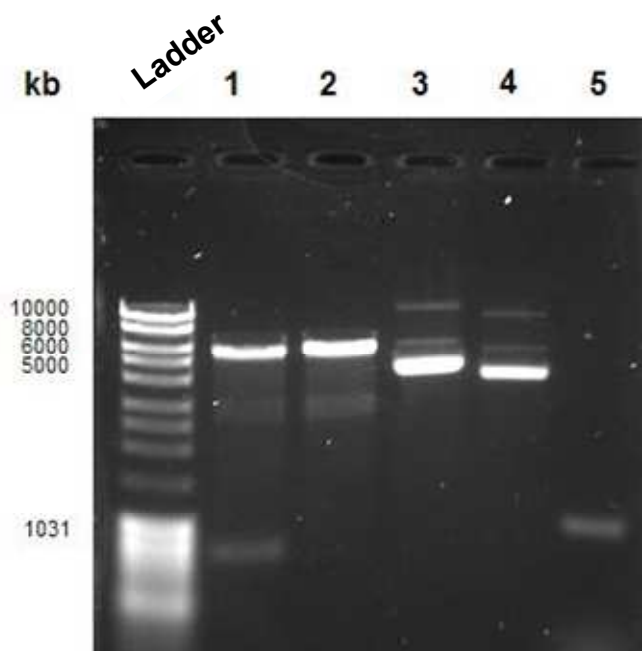

**Constructed pET-LinkCD plasmid for the expression of the LinkCD fusion protein.** The insert size is 885 bp. 1) Double digestion of pET-LinkCD with NdeI and BamHI restriction enzymes. 2) double digestion of empty plasmid, 3) uncut pET-LinkCD, 4) uncut pET15, 5) PCR amplified LinkCD fragment.

## Supporting Information Figure 2

**A**

```

reference      GGCTACAAGGAGGGAGGGGTCCCAATTGGTGGCTGCCTCATCAACAACAAGGATGGCAGT 540
mutant         GGCTACAAGGAGGGAGGGGTCCCAATTGGTGGCTGCCTCATCAACAACAAGGATGGCAGT 540
                *****

reference      GTCCTGGGCAGGGGCCACAACATGAGGTTCCAGAAGGGCAGTGCCACCCTGCATGGGGAG 600
mutant         GTCCTGGGCAGGGGCCACAACATGAGGTTCCAGAAGGGCAGTGCCACCCTGCATGGGGCG 600
                *****

reference      ATCAGCACCTGGAGAACTGTGGCAGGCTGGAGGGCAAGGTCTACAAGGACACCACTCTG 660
mutant         ATCAGCACCTGGAGAACTGTGGCAGGCTGGAGGGCAAGGTCTACAAGGACACCACTCTG 660
                *****

reference      TACACCACCTCAGCCCTTGTGACATGTGCACAGGGGCCATCATCATGTATGGCATTCCC 720
mutant         TACACCACCTCAGCCCTTGTGACATGTGCACAGGGGCCATCATCATGTATGGCATTCCC 720
                *****

```

\*\*\*\*\*

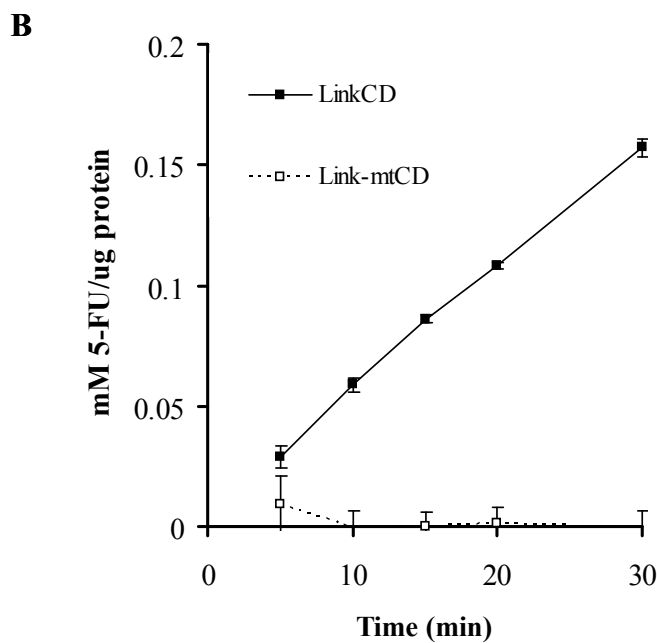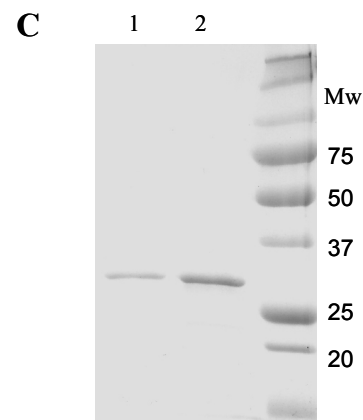

**Link-mtCD: a functional mutant that lacks the enzyme activity.** **A.** A sequence alignment between the pET-Link-mtCD (mutant) and pET-LinkCD (reference) showing the point mutation of A to C, indicated by the arrow. **B.** Enzyme assay shows that Link-mtCD does not convert 5-FC to 5-FU. **C)** SDS-PAGE gel showing purified LinkCD (lane 1) and Link-mtCD (lane 2).

## Supporting Information Figure 3

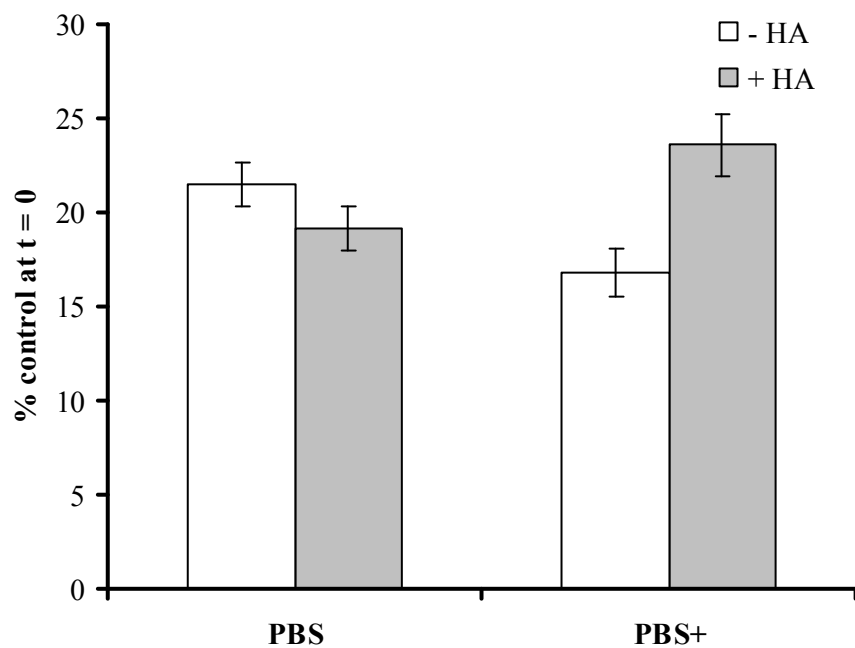**Cytosine deaminase activity of the LinkCD fusion protein after 24 hr incubation at 37°C in PBS.**

Enzyme activity of LinkCD in the presence of 0.1 mg/ml hyaluronan (HA). PBS+ contained  $\text{Ca}^{2+}$  and  $\text{Mg}^{2+}$  whereas PBS did not contain these divalent cations.

## Supporting Information Figure 4

A

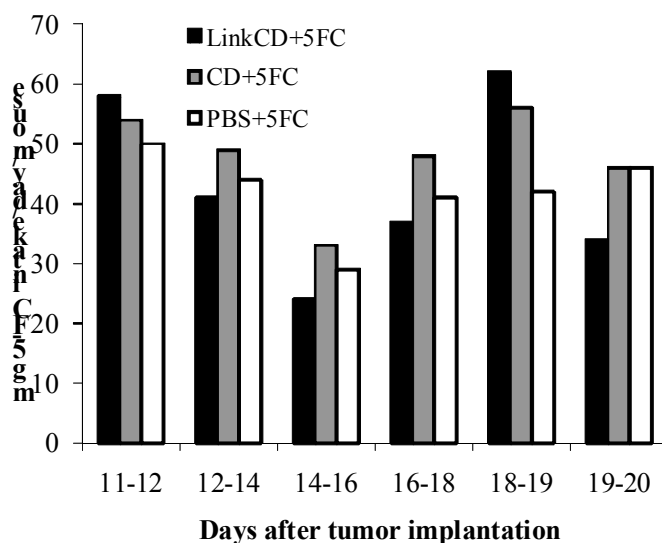

B

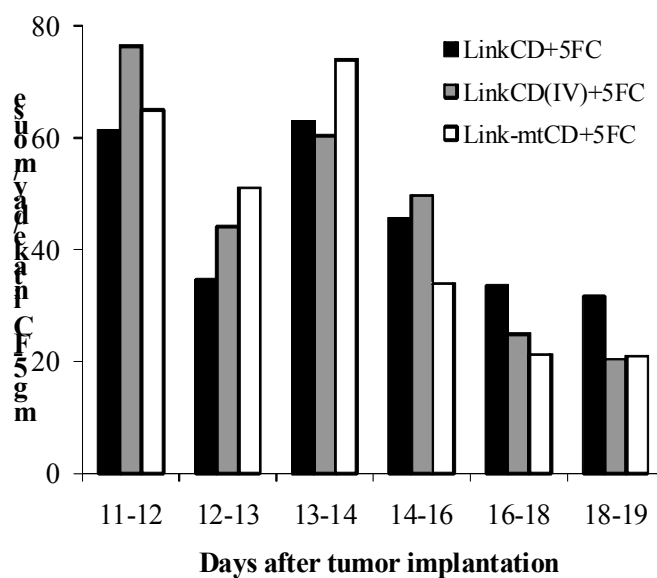

**5-FC consumption by animals in therapeutic experiments.** The amount of 5-FC consumption was estimated by weighing water bottles containing 5-FC (10mg/mL). **A.** Anti-tumor experiment with LinkCD + 5FC, CD + 5FC, and PBS + 5FC groups. **B.** Second experiment with LinkCD + 5FC, LinkCD (IV) + 5FC, and Link-mtCD + 5FC groups.

## Supporting Information Figure 5

|          | 5-FC intake (mg)/day |           |           |           |           |           |           |           |           |           |
|----------|----------------------|-----------|-----------|-----------|-----------|-----------|-----------|-----------|-----------|-----------|
|          | Day 10-12            | Day 12-14 | Day 14-16 | Day 16-18 | Day 18-20 | Day 20-22 | Day 22-24 | Day 24-26 | Day 26-28 | Day 28-30 |
| Animal 1 | 41                   | 73        | 86        | 68        | 72        | 83        | 134       | 136       | 115       | 114       |
| Animal 2 | 37                   | 76        | 83        | 76        | 84        | 74        | 159       | 90        | 88        | 124       |
| Animal 3 | 37                   | 71        | 72        | 65        | 84        | 73        | 153       | 95        | 88        | 115       |
| Animal 4 | 27                   | 71        | 73        | 45        | 91        | 74        | 100       | 75        | 100       | 105       |
| Animal 5 | 44                   | 37        | 47        | 48        | 84        | 53        | 86        | 55        | 64        | 68        |
| Animal 6 | 39                   | 60        | 63        | 42        | 37        | 91        | 88        | 69        | 70        | 70        |
| Mean     | 38                   | 65        | 71        | 57        | 75        | 75        | 120       | 87        | 88        | 99        |
| stdev    | 6                    | 15        | 14        | 14        | 20        | 13        | 33        | 28        | 19        | 24        |

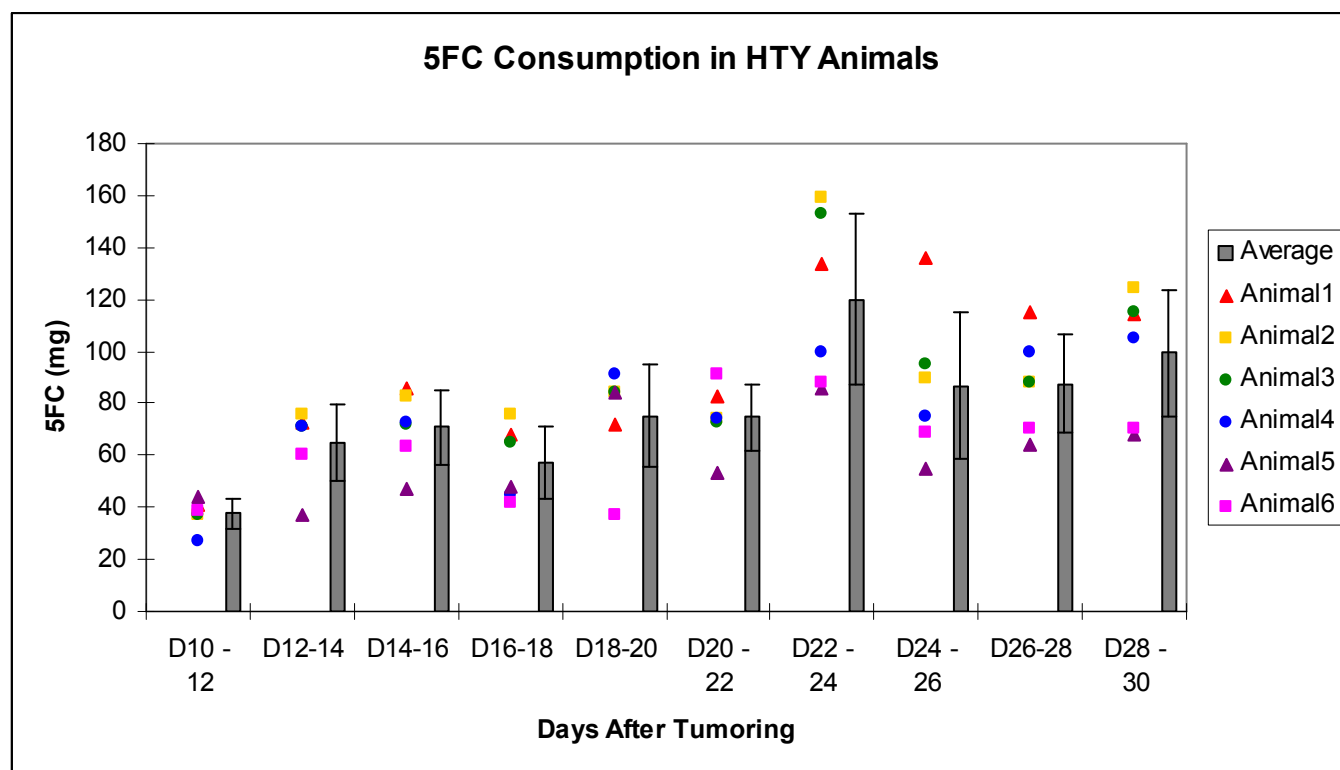

**5-FC consumption by individual animal that received LinkCD treatment.** Each animal was housed separately and the daily intake of 5-FC by individual animal was monitored. The survival of animals showed similar results as shown in Figure 4 and 5.

**Supporting Information Table 1: Summary of SPR binding kinetics data**

| pH  | $k_a$ ( $M^{-1}S^{-1}$ ) | $k_d$ ( $S^{-1}$ ) | $K_D$ (M) | $\chi^2$ |
|-----|--------------------------|--------------------|-----------|----------|
| 6.0 | 246.06                   | 0.0013             | 5.32E-6   | 0.168    |
| 7.4 | 49.35                    | 0.0027             | 5.50E-5   | 0.705    |

Summary of the binding kinetics between LinkCD and 12-mer hyaluronan measured by SPR. The  $\chi^2$  value represents the sum of squared deviation of the binding model from the experiment data. The model fits well for the interaction between LinkCD and hyaluronan at pH 7.4.
